# Supplementary material for: One-pot hydrodeoxygenation of biomass furan derivatives into decane under mild conditions over Pd/C combined with phosphotungstic acid
Source: Royal Society of Chemistry journal article supplement (doi:10.1039/d0gc00428f), 2020-01-01
Supplement: d0gc00428f1.pdf [file d0gc00428f1.pdf]

## Supporting Information:

### **One-pot hydrodeoxygenation of biomass furan derivatives into decane under mild conditions over Pd/C combined with phosphotungstic acid**

Song Li,<sup>abcd</sup> Long Yan,<sup>\*abc</sup> Qiying Liu,<sup>abc</sup> Jianguo Liu,<sup>abc</sup> Qiyu Liu,<sup>e</sup> Wei Fan,<sup>e</sup> Xuelai Zhao,<sup>f</sup> Xinghua Zhang,<sup>abc</sup> Chenguang Wang,<sup>abc</sup> Longlong Ma,<sup>abc</sup> Qi Zhang<sup>\*abc</sup>

<sup>a</sup>Guangzhou Institute of Energy Conversion, Chinese Academy of Sciences, Guangzhou 510640, PR China. E-mail: zhangqi@ms.giec.ac.cn; yanlong@ms.giec.ac.cn; Fax: +86 20 87057789; Tel: +86 20 87057789.

<sup>b</sup>CAS Key Laboratory of Renewable Energy, Guangzhou 510640, PR China.

<sup>c</sup>Guangdong Provincial Key Laboratory of New and Renewable Energy Research and Development, Guangzhou 510640, PR China.

<sup>d</sup>University of Chinese Academy of Sciences, Beijing 100049, PR China.

<sup>e</sup>Department of Chemical Engineering, University of Massachusetts-Amherst, 159 Goessman Lab, 686 N Pleasant Street, Amherst, 01003, USA.

<sup>f</sup>Department of Thermal Science and Energy Engineering, University of Science and Technology of China, Hefei, 233022, China.

## Contents page

|                                                                    |    |
|--------------------------------------------------------------------|----|
| Preparation details.....                                           | 3  |
| HDO of lactones at different conditions .....                      | 4  |
| TEM/EDS images of catalysts .....                                  | 5  |
| W 4f XPS spectra of HPW and Pd/C-HPW (50:50) catalysts .....       | 9  |
| XRD spectra of fresh/used Pd/C and Pd/C-HPW (50:50) catalysts..... | 10 |
| NMR spectra of FDLA/DC/ $\gamma$ -decalactone .....                | 11 |
| References .....                                                   | 14 |

## Preparation details

**Preparation of FDLA<sup>1</sup>:** 18.6 g LA was neutralized with 24.0 g Na<sub>2</sub>CO<sub>3</sub> at room temperature in 100 ml deionized water. The solution was heated to reflux under stirring and then added with a mixture of 7.7 g furfural in 16 ml ethanol dropwise. It was cooled in ice water after no furfural was detected. The cooled solution was slowly poured into excessive diluted hydrochloric acid to collect the solid condensation products. FDLA was obtained by recrystallization of the solid products from hot water.

**Preparation of HPW-300:** HPW-300 was prepared by calcination of HPW at 300 °C for 4 h in air.

**Preparation of Pd/C<sub>Reduced</sub>:** 50 mg Pd/C was reduced in 10 ml cyclohexane under 3 MPa H<sub>2</sub> at 170 °C for 4 h. Pd/C<sub>Reduced</sub> was obtained after evaporation of solvent.

**Preparation of Pd/C<sub>Reduced</sub>-HPW(50:50):** 50 mg Pd/C was reduced in 10 ml cyclohexane under 3 MPa H<sub>2</sub> at 170 °C for 4 h. 50 mg HPW was added after cooling to room temperature. The sealed reactor was purged with H<sub>2</sub> four times and charged with 3 MPa H<sub>2</sub>. Then, the reactor was heated to 170 °C and kept for 4 h. Pd/C<sub>Reduced</sub>-HPW(50:50) was obtained after evaporation of solvent.

## HDO of lactones at different conditions

Table S1 HDO of lactones at different conditions<sup>a</sup>

| Entry | Model compounds       | Pd/C (mg) | HPW (mg) | Temperature (°C) | Conversion (%) | Yield (%) |        |                  |               |                       |                |                |       |
|-------|-----------------------|-----------|----------|------------------|----------------|-----------|--------|------------------|---------------|-----------------------|----------------|----------------|-------|
|       |                       |           |          |                  |                | Nonane    | Decane | Decanoic alcohol | Decanoic acid | $\gamma$ -Decalactone | Decanoic ether | Decanoic ester | Sum   |
| 1     | DC <sup>b</sup>       | /         | 50       | 170              | 65.83          | 0         | 0      | 0                | 0             | 0                     | 0              | 0              | 0     |
| 2     | $\gamma$ -Decalactone | /         | 50       | 170              | 27.54          | 0         | 0      | 0                | 1.05          | -                     | 0              | 0              | 1.05  |
| 3     | DC                    | 50        | /        | 170              | 53.14          | 0         | 0      | 0                | 0             | 0.71                  | 0              | 0              | 0.71  |
| 4     | $\gamma$ -Decalactone | 50        | /        | 170              | 24.96          | 0         | 0      | 0                | 1.66          | -                     | 0              | 0              | 1.66  |
| 5     | DC                    | 50        | 50       | 170              | 100            | 3.08      | 94.58  | 0                | 0             | 0                     | 0              | 0              | 97.66 |
| 6     | $\gamma$ -Decalactone | 50        | 50       | 170              | 100            | 3.15      | 95.09  | 0                | 0             | -                     | 0              | 0              | 98.24 |
| 7     | $\gamma$ -Decalactone | 50        | 50       | 160              | 100            | 1.58      | 33.84  | 1.27             | 11.98         | -                     | 19.14          | 27.32          | 95.13 |
| 8     | $\gamma$ -Decalactone | 50        | 50       | 150              | 100            | 0.89      | 12.66  | 1.07             | 23.17         | -                     | 21.82          | 36.96          | 96.57 |
| 9     | $\gamma$ -Decalactone | 50        | 50       | 140              | 100            | 0.47      | 8.28   | 0.77             | 37.11         | -                     | 13.99          | 35.82          | 96.44 |
| 10    | $\gamma$ -Decalactone | 50        | 50       | 130              | 100            | 0         | 3.54   | 0                | 58.41         | -                     | 0              | 5.57           | 67.51 |
| 11    | $\gamma$ -Decalactone | 25        | 50       | 170              | 100            | 2.11      | 17.47  | 0.84             | 24.05         | -                     | 11.16          | 27.43          | 83.06 |
| 12    | $\gamma$ -Decalactone | 50        | 25       | 170              | 100            | 2.86      | 15.71  | 0.80             | 23.65         | -                     | 14.69          | 31.49          | 89.20 |

<sup>a</sup>Reaction conditions: lactones (0.515 mmol), cyclohexane (10 mL), 3 MPa H<sub>2</sub> at room temperature, stirred at 400 rpm, reacted at desired temperature for 4 h; <sup>b</sup>DC: 5-(2-(tetrahydrofuran-2-yl)ethyl)-dihydrofuran-2(3H)-one.

## TEM/EDS images of catalysts

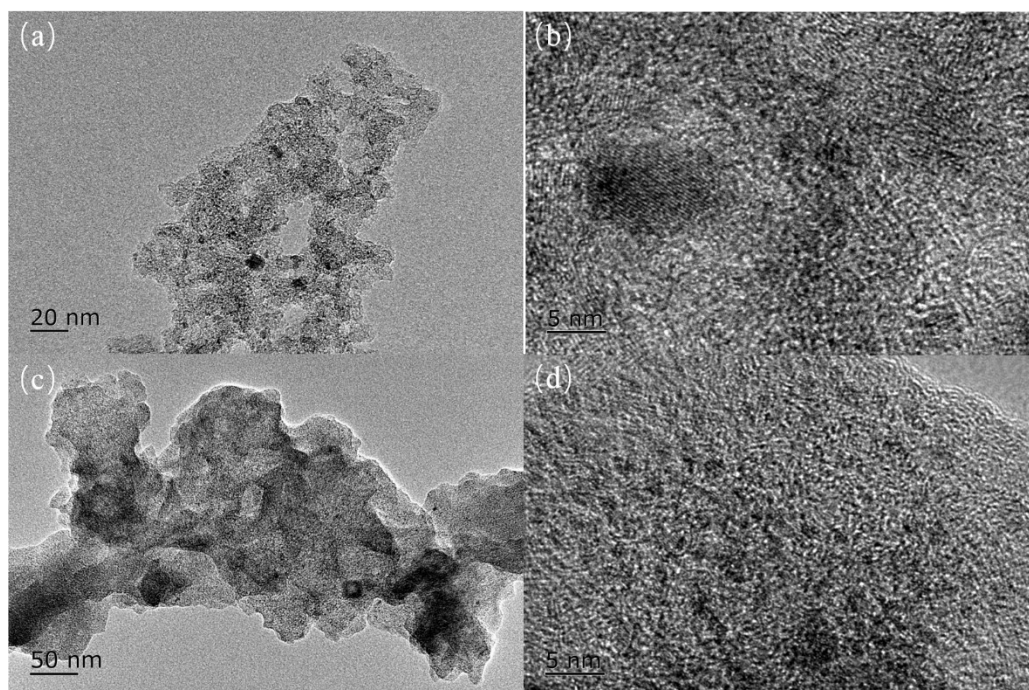

Figure S1 TEM images of Ru/C (a, b) and Ru/C-HPW (50:50) (c, d) catalysts

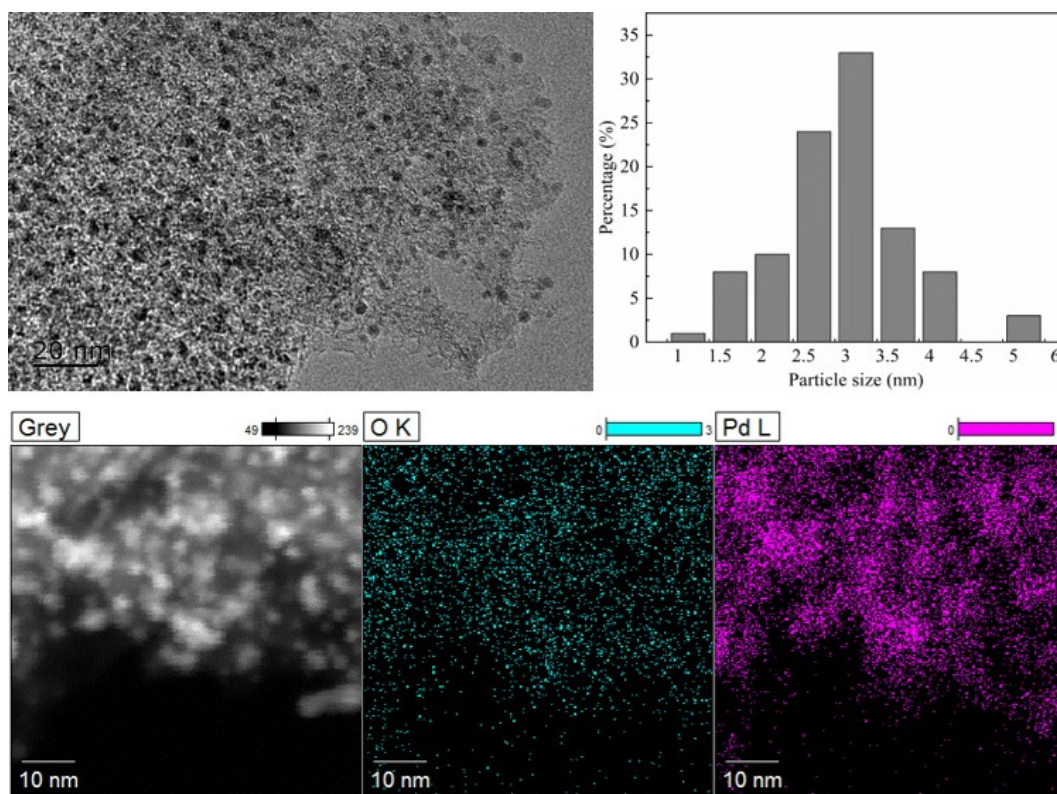

Figure S2 TEM/EDS images of Pd/C catalyst

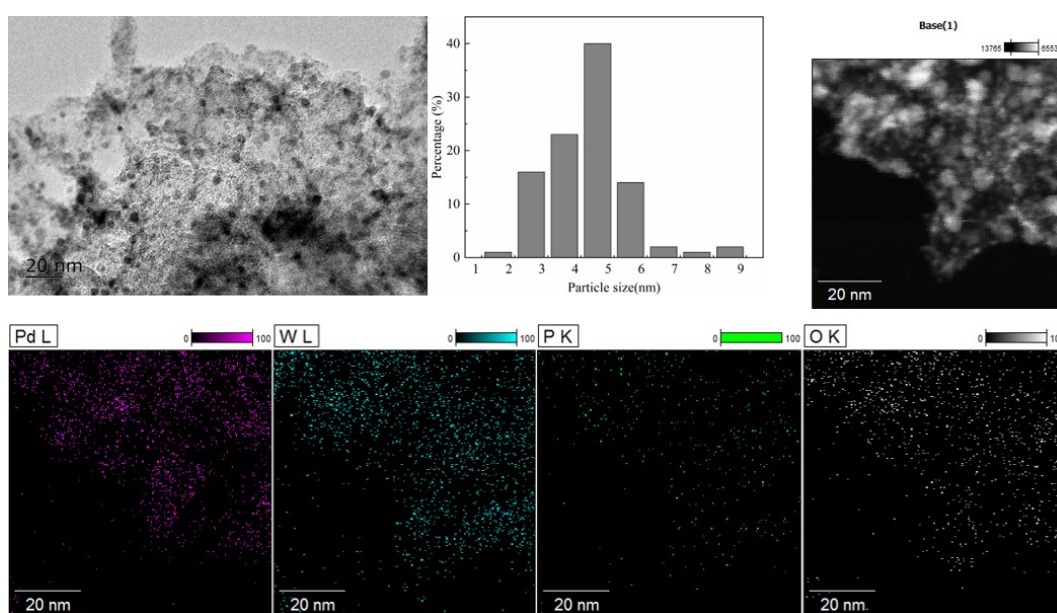

Figure S3 TEM/EDS images of Pd/C-HPW (50:50) catalyst

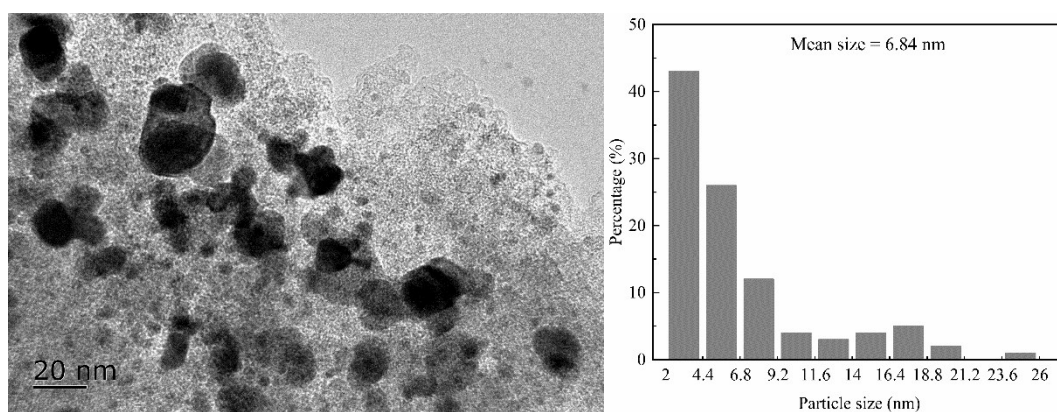



Figure S4 TEM image of Pd/C<sub>Reduced</sub> catalyst

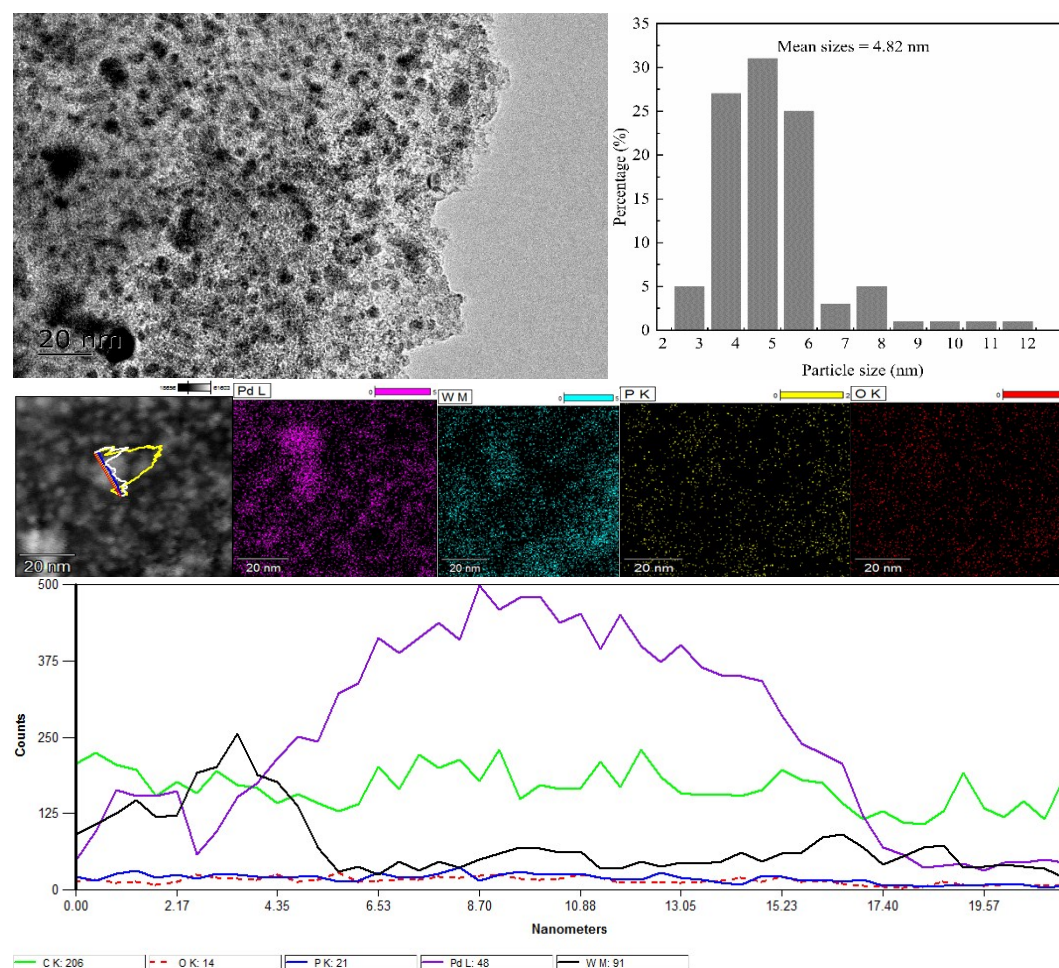

Figure S5 TEM/EDS images of Pd/C<sub>Reduced</sub>-HPW (50:50) catalyst

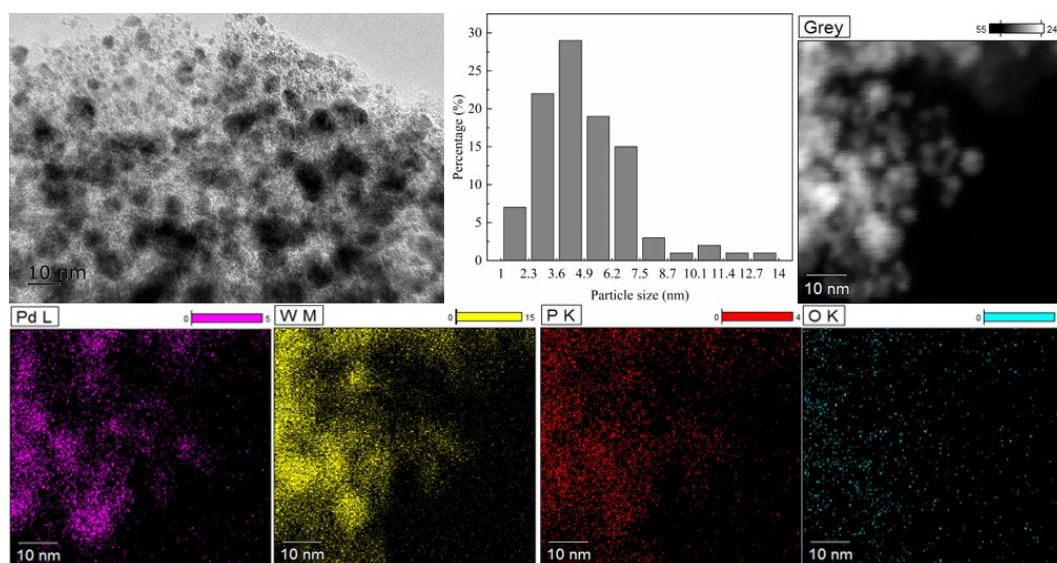

Figure S6 TEM/EDS images of recycled Pd/C-HPW (50:50) catalyst

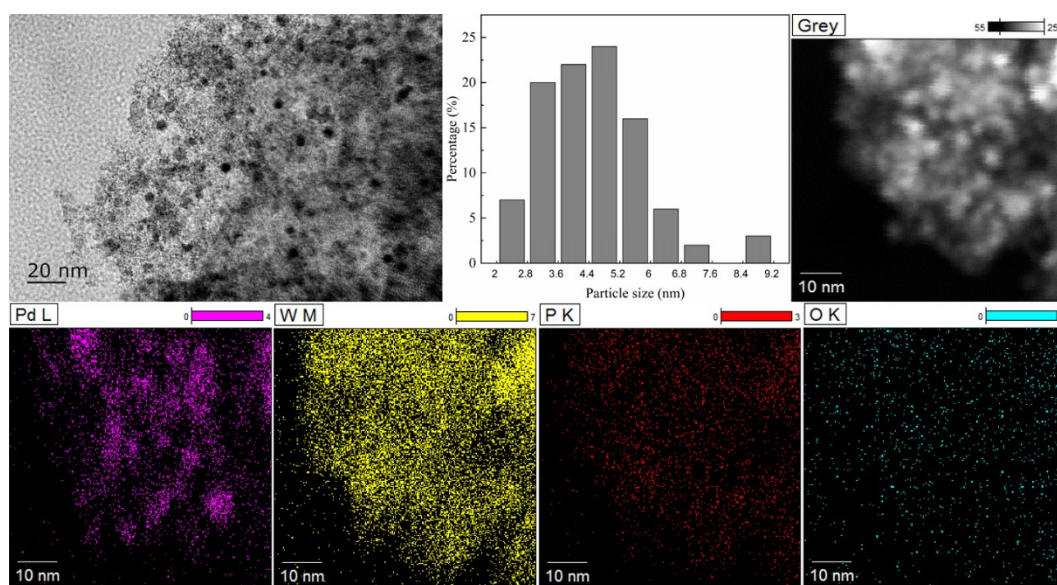

Figure S7 TEM/EDS images of recycled Pd/C-HPW (50:50) catalyst washed with water and ethanol



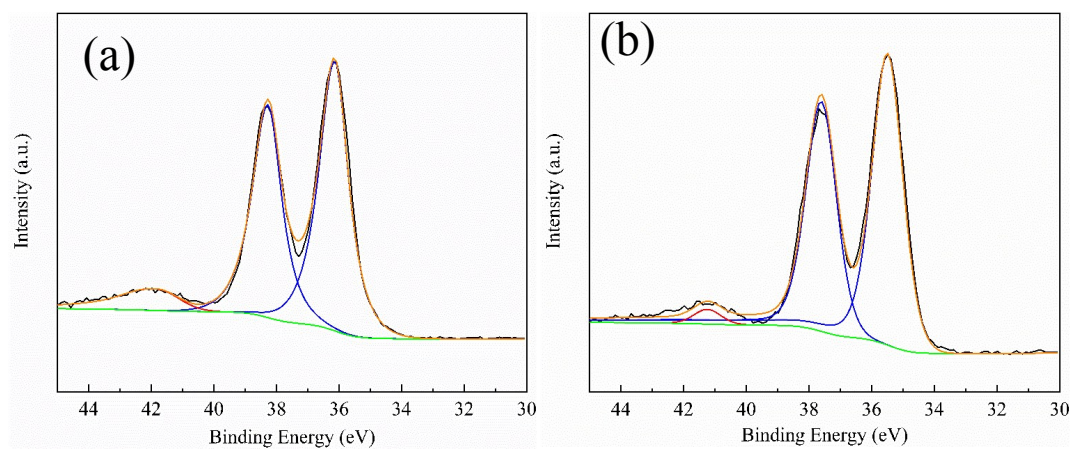

**W 4f XPS spectra of HPW and Pd/C-HPW (50:50) catalysts**

Figure S8 W 4f XPS spectra of HPW (a) and Pd/C-HPW (50:50) (b) catalysts

### XRD spectra of fresh/used Pd/C and Pd/C-HPW (50:50) catalysts

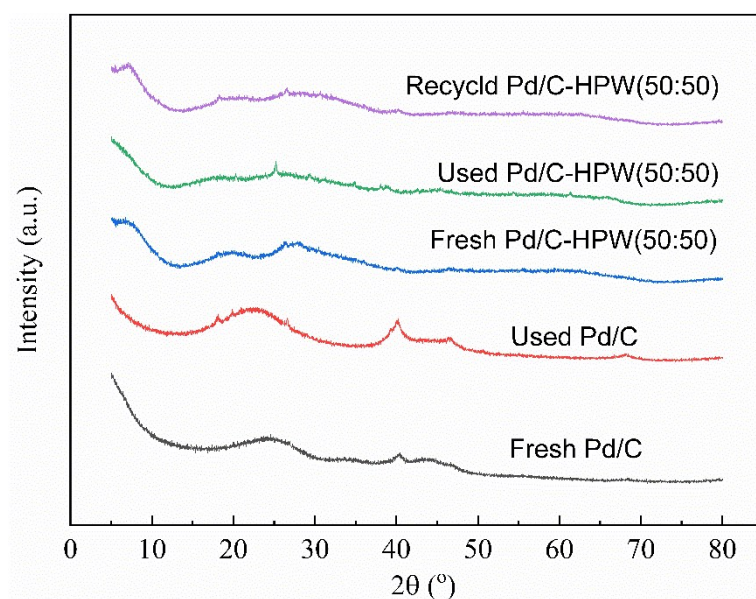

Figure S9 XRD spectra of fresh/used Pd/C and Pd/C-HPW (50:50) catalysts

### NMR spectra of FDLA/DC/ $\gamma$ -decalactone

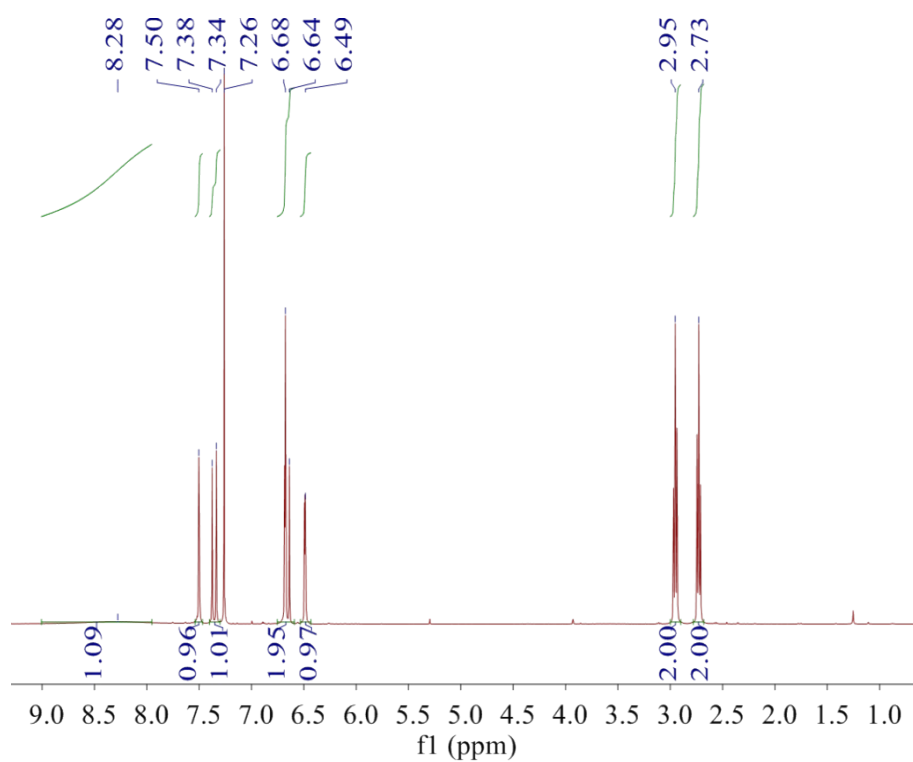

Figure S10 <sup>1</sup>H-NMR spectra of FDLA

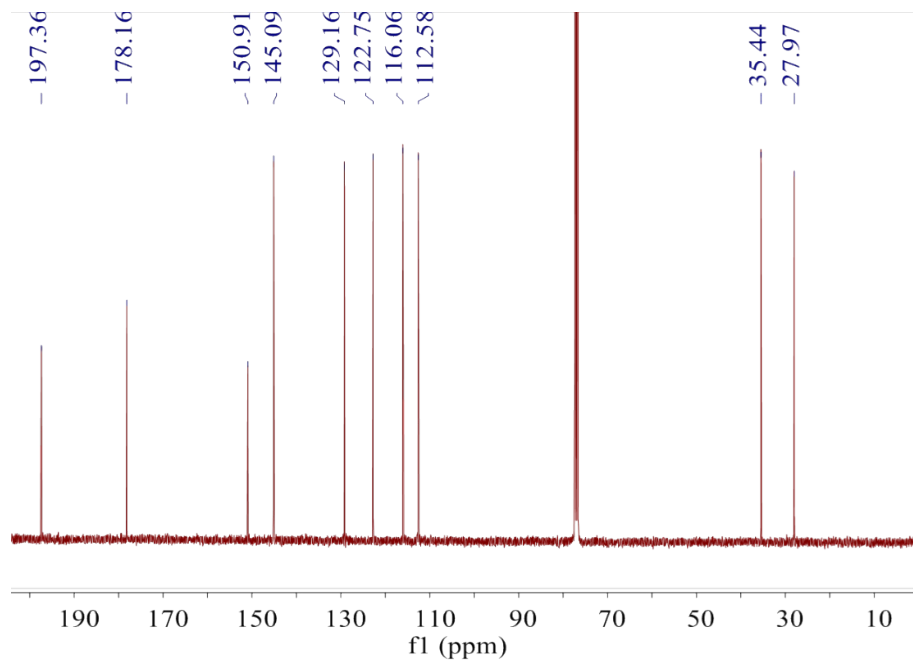

Figure S11 <sup>13</sup>C-NMR spectra of FDLA

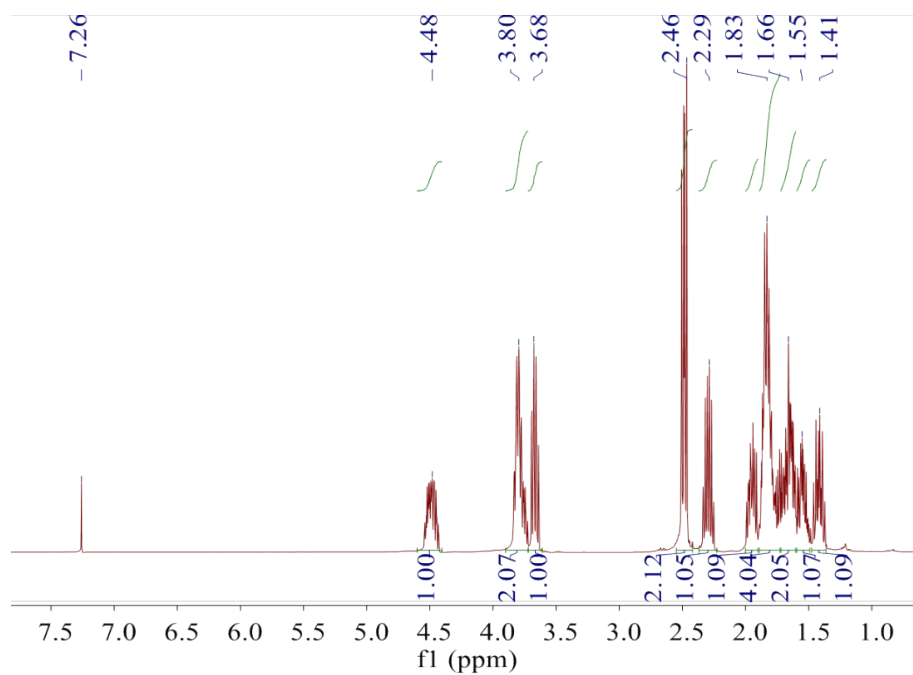

Figure S12 <sup>1</sup>H-NMR spectra of DC

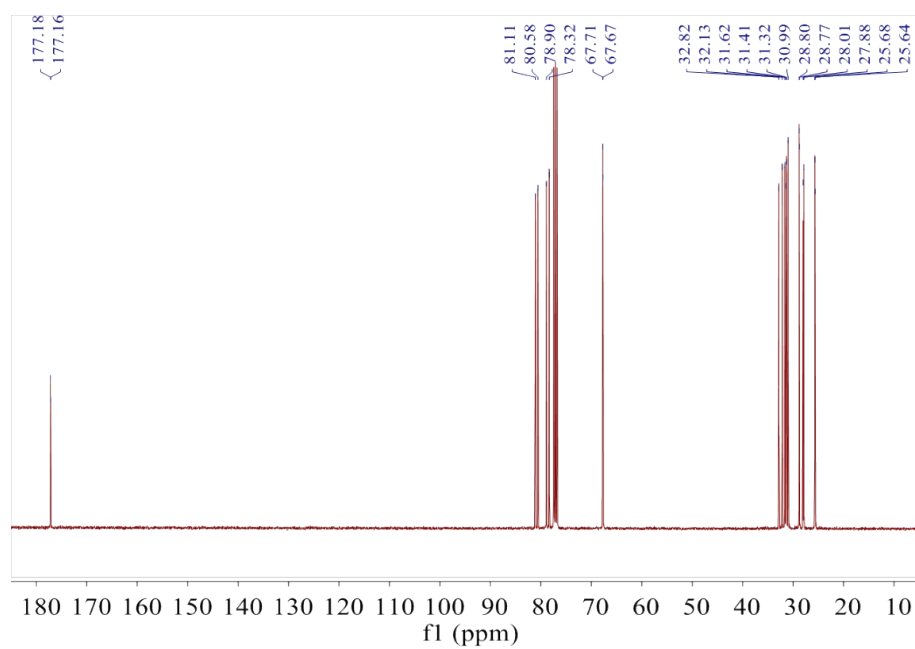

Figure S13 <sup>13</sup>C-NMR spectra of DC

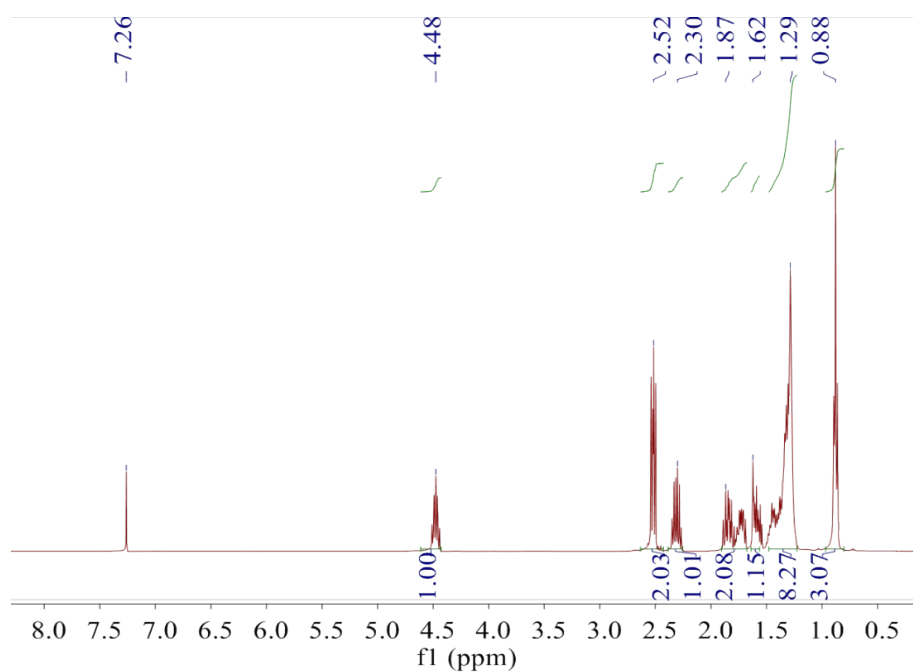

Figure S14 <sup>1</sup>H-NMR spectra of  $\gamma$ -decalactone

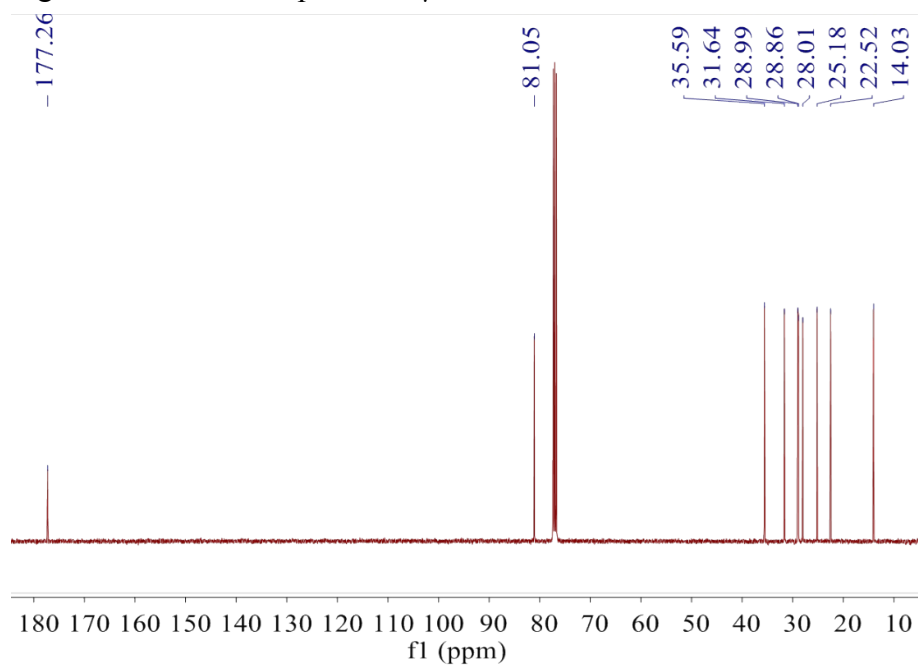

Figure S15 <sup>13</sup>C-NMR spectra of  $\gamma$ -decalactone



## References

Reference :

1. Y. Hachihama and I. Hayashi, 1954, **13**, 201-209.
